# Supplementary figures and images for: An embryo-specific expressing TGF-β family protein, growth-differentiation factor 3 (GDF3), augments progression of B16 melanoma
Source: Springer Nature journal article supplement (doi:10.1186/1756-9966-29-135), 2010-10-15

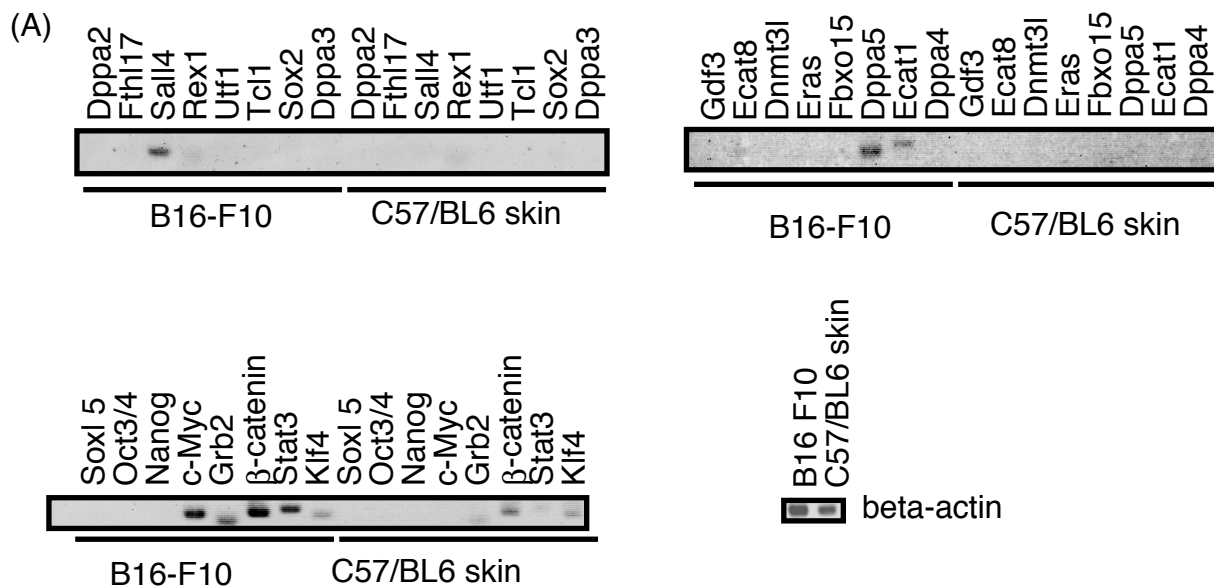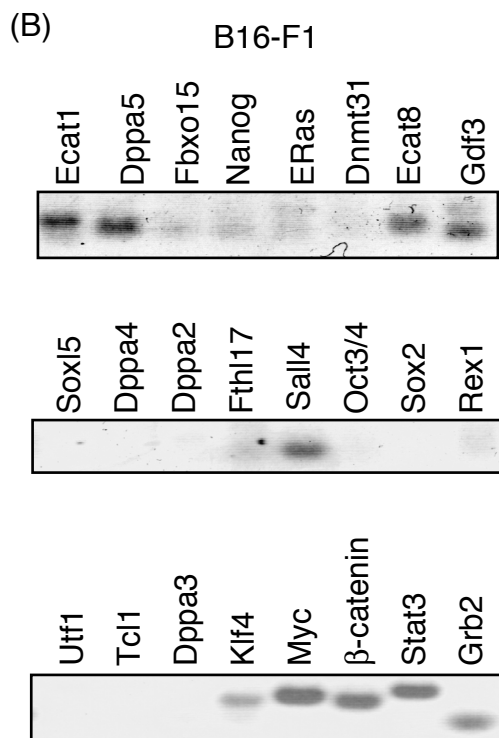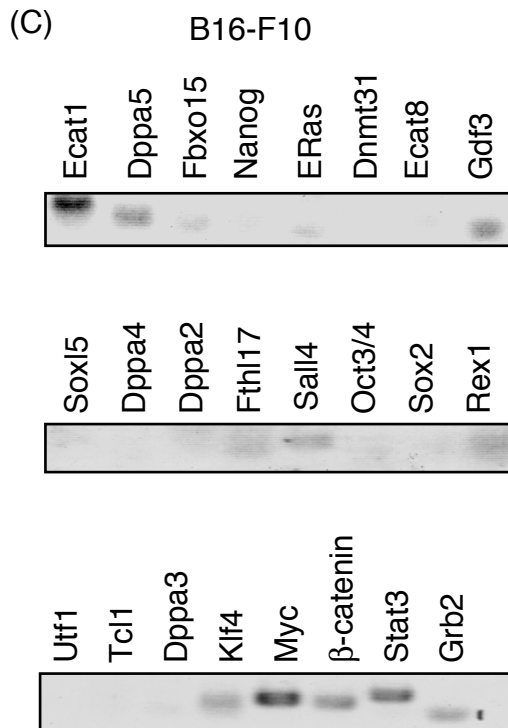

Supplement: 13046_2010_382_MOESM1_ESM.pdf [file 13046_2010_382_MOESM1_ESM.pdf]
